# Supplementary material for: FOXP1-GINS1 axis promotes DLBCL proliferation and directs doxorubicin resistance
Source: PubMed Central journal article supplement (PMC10414051; doi:10.7150/jca.85906), 2023-07-16
Supplement: jcav14p2289s1.pdf [file jcav14p2289s1.pdf]

**Supplementary table S1. Characteristics of the 35 patients with DLBCL**

| Characteristic | n  | GINS1*                               |                                     | P value       |
|----------------|----|--------------------------------------|-------------------------------------|---------------|
|                |    | High expression<br>(number of cases) | Low expression<br>(number of cases) |               |
| Total          |    |                                      |                                     |               |
| Gender         |    |                                      |                                     |               |
| Male           | 20 | 16                                   | 4                                   | 0.4505        |
| Female         | 15 | 10                                   | 5                                   |               |
| Age            |    |                                      |                                     |               |
| <70            | 28 | 20                                   | 8                                   | 0.6478        |
| ≥ 70           | 7  | 6                                    | 1                                   |               |
| Stage          |    |                                      |                                     |               |
| I-II           | 9  | 3                                    | 6                                   | <b>0.0033</b> |
| III-IV         | 26 | 23                                   | 3                                   |               |
| FOXP1*         |    |                                      |                                     |               |
| Positive       | 29 | 25                                   | 4                                   | <b>0.0021</b> |
| Negative       | 6  | 1                                    | 5                                   |               |

\*FOXP1: The expression of FOXP1 was performed by Immunohistochemical staining. FOXP1 positive DLBCL was defined as 30% or more of the lymphoma cells showing distinct FOXP1 nuclear staining. For FOXP1-negative DLBCL cases, FOXP1 staining cells was less 30% of the lymphoma cells.

\*GINS1: Western blotting was used to measure the GINS1 protein levels. ImageJ was used to compare the density of bands on western blot. Compared with the GINS1 average value of control people, when relative density values were above 2.5, then it was defined as high expression. While relative density values were below 2.5, then it was defined as low expression.

**Supplementary table S2. Primers sequences and shRNA target sequences**

| Name                   | Sequences                   |
|------------------------|-----------------------------|
| Primer                 |                             |
| Human GINS1-Forward    | 5' CTTCAACGAGGATGGACT 3'    |
| Human GINS1-Reverse    | 5' CATTGGCAAGACGCTAC 3'     |
| GAPDH Forward          | 5'TGAACGGGAAGCTCACTGG 3'    |
| GAPDH Reverse          | 5'TCCACCACCCTGTTGCTGTA 3'   |
| FOXP1 Forward          | 5'TCAGTGGTAACCCTTCCCTTA 3'  |
| FOXP1 Reverse          | 5'GTACAGGATGCACGGCTTG 3'    |
| shRNA target sequences |                             |
| shcontrol              | 5' CCTAAGGTTAAGTCGCCCTCG 3' |
| shFOXP1-1              | 5' CAGCAGCAAGTTAGTGGATTA 3' |
| shFOXP1-2              | 5' CAGGCGGTACTCAGACAAATA 3' |
| shGINS1-1              | 5' TCAGGTGGACGAAGTGATT 3'   |
| shGINS1-2              | 5' CCTGTATGACCGCTTGCTT 3'   |

**Supplementary table S3. Plasmids**

| Reagent or Resource              | Source      | Identifier |
|----------------------------------|-------------|------------|
| pCDH-CMV-MCS-EF1-CopGFP-T2A-puro | Addgene     | Cat#72263  |
| pLP1                             | Miaolingbio | P0264      |
| pLP2                             | Miaolingbio | P0265      |
| pLP/VSVG                         | Miaolingbio | P0266      |
| pLKO.1 puro                      | Addgene     | Cat#8453   |
| psPAX2                           | Addgene     | Cat#12260  |
| pMD2.G                           | Addgene     | Cat#12259  |
| pLKO.1-shGINS1 -1                | This paper  | N/A        |
| pLKO.1-shGINS1 -2                | This paper  | N/A        |
| PLKO.1-shFoxp1-1                 | This paper  | N/A        |
| PLKO.1-shFoxp1-2                 | This paper  | N/A        |
| pCDH- GINS1                      | This paper  | N/A        |
| pCDH- FOXP1                      | This paper  | N/A        |
| pcDNA 3.1(+) Foxp 1              | This paper  | N/A        |
| pET28a-FOXP1                     | This paper  | N/A        |
| pGL-4.17 Basic                   | Promega     | #9PIE672   |
| P-1322/+117-LUC                  | This paper  | N/A        |
| P-1501/+117-LUC                  | This paper  | N/A        |
| P-1501mA/+117-LUC                | This paper  | N/A        |
| P-1501mB/+117-LUC                | This paper  | N/A        |
| P-1501mA-B/+117-LUC              | This paper  | N/A        |

**Supplementary table S4. Promoter correlation probes and primers sequences**

| name                 | Sequences                       |
|----------------------|---------------------------------|
| Probe A sense        | 5' TCAAAAAGGCAATGTTTGCTGGGTG 3' |
| Probe A antisense    | 5' CACCCAGCAAACATTGCCTTTTTGA 3' |
| Probe B sense        | 5' AGCTCAAGAGTTGTCGACCAGACTG 3' |
| Probe B antisense    | 5' CAGTCTGGTCGACAACTCTTGAGCT 3' |
| ChIP-GINS1 sense     | 5' GGCGGTTAGAAGCAAGATGG 3'      |
| ChIP-GINS1 antisense | 5' ATTTTCCCCCCTCAGCCCTC 3'      |

**Supplementary table S5. Chemicals and reagents**

| REAGENT or RESOURCE                        | SOURCE       | IDENTIFIER  |
|--------------------------------------------|--------------|-------------|
| <b>Chemicals, consumables</b>              |              |             |
| TRIZol                                     | Beyotime     | Cat# R0016  |
| BeyoRT™ II cDNA first chain synthesis kit  | Beyotime     | Cat# D7168L |
| IPTG                                       | ThermoFisher | Cat# 34060  |
| Firefly Luciferase Reporter Gene Assay Kit | Beyotime     | Cat# RG005  |
| β-galactosidase Assay Kit                  | Beyotime     | Cat# RG0036 |
| Chromatin Immunoprecipitation              | Beyotime     | Cat# P2078  |

|                                                 |                     |              |
|-------------------------------------------------|---------------------|--------------|
| (ChIP)Assay Kit                                 |                     |              |
| Chemiluminescent EMSA Kit                       | Beyotime            | Cat# GS009   |
| Cell Counting Kit-8                             | Apexbio             | Cat# K1018   |
| SYBR <sup>®</sup> Premix Ex Taq <sup>™</sup> II | Takara              | Cat# DRR820A |
| Cell Culture Flask                              | NEST Biotechnology  | Cat# 707003  |
| 50mL Min Bioreactor                             | NEST Biotechnology  | Cat# 788211  |
| <b>Antibodies</b>                               |                     |              |
| Anti-GINS1                                      | Abcam               | ab181112     |
| Anti-a-Tubulin                                  | Proteintech company | 66031-1-Ig   |
| Anti-Flag                                       | Proteintech company | 66008-4-Ig   |
| Anti-FOXP1                                      | Abcam               | ab134055     |
| Anti-Ki67                                       | ThermoFisher        | MA5-14520    |
| Doxorubicin                                     | Sigma-Aldrich       | D1515        |

---
